# Supplementary material for: Human forebrain organoid-based multi-omics analyses of PCCB as a schizophrenia associated gene linked to GABAergic pathways
Source: PubMed Central journal article supplement (PMC10449845; doi:10.1038/s41467-023-40861-2), 2023-08-24
Supplement: 41467_2023_40861_MOESM3_ESM.pdf [file 41467_2023_40861_MOESM3_ESM.pdf]

## **Description of Additional Supplementary Files**

File Name: Supplementary Data 1

Description: Datasets used for gene prioritization

File Name: Supplementary Data 2

Description: PCCB knockdown-induced DEGs and functional analysis

File Name: Supplementary Data 3

Description: Metabolomic analysis results

File Name: Supplementary Data 4

Description: PCCB eSNP-containing DNA sequence, RT-qPCR primers and antibodies
